# Supplementary material
Source: PubMed Central journal article supplement (PMC4794039)
Supplement: frel021512.ww1_default.pdf [file frel021512.ww1_default.pdf]

**Appendix 1:** Patients information visual analogue scale [posted as supplied by author]

**How would you rate your pain during a contraction?**

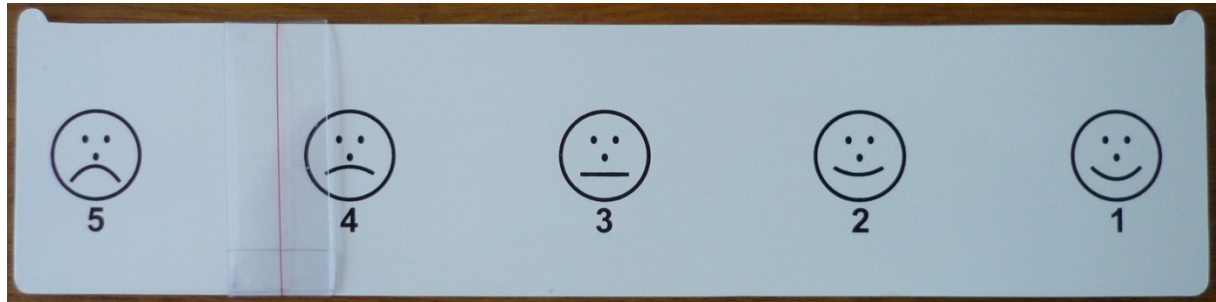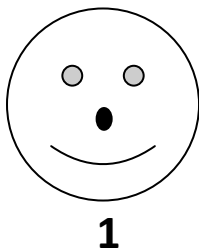

You put the marker on the ruler at the smiley face marked 1 if you don't feel any pain during a contraction.

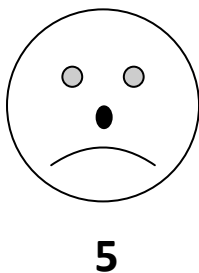

You put the marker on the ruler at the smiley face marked 5 if you experience the worst pain you can imagine during a contraction.

**You put the line on the white ruler at the face (or between faces) that correspond with your pain during a contraction. Or on the colored ruler the face that corresponds with your satisfaction with pain relief. The number on the back of the ruler will be written down.**

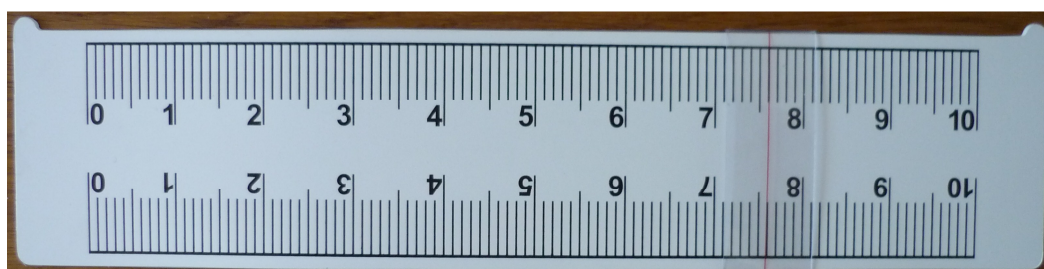

## How would you rate your satisfaction with pain relief?

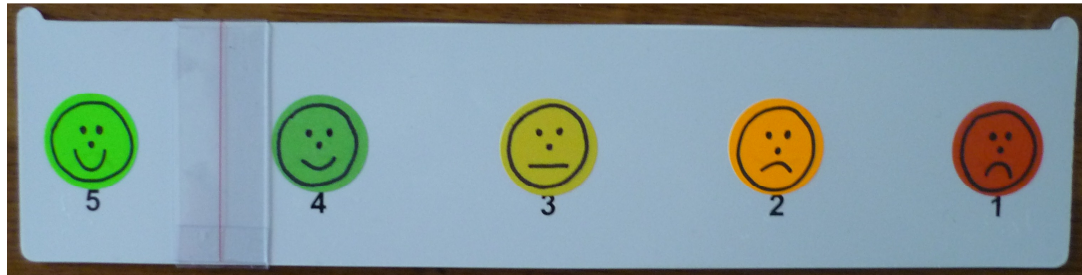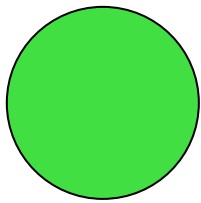

**5**

You put the marker on the ruler at the smiley marked 5 if you are maximally satisfied with pain relief.

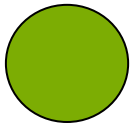

**4: good pain relief**

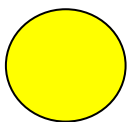

**3: moderate pain relief**

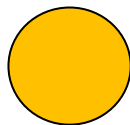

**2: bad pain relief**

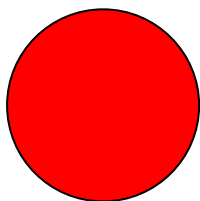

**1**

You put the marker on the ruler at the smiley marked 1 if you are absolutely not satisfied with pain relief.
