# Supplementary material
Source: PubMed Central journal article supplement (PMC4794039)
Supplement: frel021512.ww2_default.pdf [file frel021512.ww2_default.pdf]

## Appendix 2: Supplementary tables [posted as supplied by author]

Table A Baseline characteristics complete and incomplete cases, AUC during active labour

|                                                        | AUC no<br>(incomplete) | AUC yes<br>(complete) | p<br>value |
|--------------------------------------------------------|------------------------|-----------------------|------------|
| Gestational age at randomisation (weeks; median [IQR]) | 37.9 [36.2-39.4]       | 37.9 [35.8-39.4]      | 0.66       |
| Maternal age (years; means [SD])                       | 31.5 [5.1]             | 31.5 [5.4]            | 0.96       |
| Ethnic origin*                                         |                        |                       |            |
| Caucasian                                              | 240 (91%)              | 450 (85%)             | 0.05       |
| Education                                              |                        |                       |            |
| ≥HBO                                                   | 289 (50%)              | 288 (50%)             | 0.13       |
| Body mass index (median [IQR])                         | 24.2 [21.8-27.5]       | 24.2 [21.7-27.8]      | 0.28       |
| ASA classification                                     |                        |                       |            |
| ASA 1                                                  | 185 (70%)              | 374 (71%)             | 0.80       |
| ASA 2                                                  | 80 (30%)               | 155 (29%)             |            |
| Parity                                                 |                        |                       |            |
| 0                                                      | 144 (54%)              | 294 (56%)             | 0.74       |
| ≥1                                                     | 121 (46%)              | 235 (44%)             |            |
| Multiple pregnancy                                     | 16 (5.9%)              | 20 (3.7%)             | 0.26       |

Table B Labour characteristics complete and incomplete cases, AUC during active labour

|                                                            | AUC no<br>(incomplete) | AUC yes<br>(complete) | p<br>value |
|------------------------------------------------------------|------------------------|-----------------------|------------|
| Gestational age at delivery (days; median [IQR])           | 278 [267-285]          | 278 [269-285]         | 0.07       |
| Onset of labor                                             |                        |                       |            |
| Spontaneous                                                | 344 (49%)              | 219 (33%)             | <0.001     |
| Induced                                                    | 354 (51%)              | 441 (67%)             |            |
| Request pain relief                                        |                        |                       |            |
| Yes                                                        | 265 (38%)              | 529 (80%)             | <0.001     |
| Dilatation at request pain relief (cm; median [IQR])       | 4 [3-5]                | 4 [3-5]               | 0.28       |
| Fetal condition at start pain relief (CTG) n=794           |                        |                       |            |
| Optimal                                                    | 389 (90%)              | 539 (91%)             | 0.61       |
| Not optimal                                                | 41 (10%)               | 52 (9)                |            |
| Meconium stained amniotic fluid                            | 73 (11%)               | 83 (13%)              | 0.20       |
| Augmentation with oxytocin                                 | 343 (49%)              | 453 (69%)             | <0.001     |
| >24 hours ROM                                              | 47 (7%)                | 51 (8%)               | 0.48       |
| Time from request to start analgesia (hours, median [IQR]) | 0.69 [0.42-1.2]        | 0.57 [0.28-1.0]       | 0.49       |
| Duration of analgesia (hours, median [IQR])                | 4.4 [2.2-7.1]          | 4.6 [2.5-7.1]         | 0.58       |
| Duration second stage of labour (hours, median [IQR])      | 0.30 [0.15-0.77]       | 0.43 [0.17-0.90]      | 0.01       |
| Mode of delivery                                           |                        |                       |            |
| Spontaneous                                                | 557 (80%)              | 462 (70%)             | <0.001     |
| Vaginal instrumental                                       | 50 (7%)                | 83 (13%)              |            |
| Caeserean section                                          | 91 (13%)               | 115 (17%)             |            |
| Postpartum haemorrhage (≥1000 ml)                          | 59 (9%)                | 59 (9%)               | 0.79       |
| Apgar score <7 neonate 1                                   |                        |                       |            |
| 5 min                                                      | 12 (2%)                | 12 (2%)               | 0.89       |
| pHa <7.10 neonate 1                                        | 28 (6%)                | 22 (5%)               | 0.46       |

Table C Baseline characteristics complete and incomplete cases, AUC after pain relief

|                                                        | AUC no<br>(incomplete) | AUC yes<br>(complete) | p<br>value |
|--------------------------------------------------------|------------------------|-----------------------|------------|
| Gestational age at randomisation (weeks; median [IQR]) | 37.9 [36.2-39.4]       | 37.9 [35.8-39.4]      | 0.99       |
| Maternal age (years; means [SD])                       | 31.4 [5.1]             | 31.5 [5.4]            | 0.87       |
| Ethnic origin*                                         |                        |                       |            |
| Caucasian                                              | 272 (90%)              | 418 (86%)             | 0.11       |
| Education                                              |                        |                       |            |
| ≥HBO                                                   | 133 (46%)              | 221 (54%)             | 0.96       |
| Body mass index (median [IQR])                         | 24.2 [21.8-27.5]       | 24.2 [21.7-27.8]      | 0.26       |
| ASA classification                                     |                        |                       |            |
| ASA 1                                                  | 205 (68%)              | 354 (72%)             | 0.18       |
| ASA 2                                                  | 98 (32%)               | 137 (28%)             |            |
| Parity                                                 |                        |                       |            |
| 0                                                      | 165 (54%)              | 273 (56%)             | 0.75       |
| ≥1                                                     | 138 (46%)              | 218 (44%)             |            |
| Multiple pregnancy                                     | 15 (4.9%)              | 16 (3.3%)             | 0.29       |

Table D Labour characteristics complete and incomplete cases, AUC after pain relief

|                                                            | AUC no<br>(incomplete) | AUC yes<br>(complete) | p<br>value |
|------------------------------------------------------------|------------------------|-----------------------|------------|
| Gestational age at delivery (days; median [IQR])           | 278 [268-287]          | 278 [270-286]         |            |
| Onset of labor                                             |                        |                       | 0.93       |
| Spontaneous                                                | 104 (34%)              | 167 (34%)             |            |
| Induced                                                    | 199 (66%)              | 324 (66%)             |            |
| Dilatation at request pain relief (cm; median [IQR])       | 4.0 [3.0-5.0]          | 3.9 [3.0-5.0]         | 0.35       |
| Fetal condition at start pain relief (CTG) n=794           |                        |                       |            |
| Optimal                                                    | 272 (90.7%)            | 443 (90.2%)           | 0.84       |
| Not optimal                                                | 28 (9.3%)              | 48 (9.8%)             |            |
| Meconium stained amniotic fluid                            | 30 (11%)               | 62 (14%)              | 0.25       |
| Augmentation with oxytocin                                 | 199 (66%)              | 340 (69%)             | 0.31       |
| >24 hours ROM                                              | 20 (7%)                | 41 (8%)               | 0.37       |
| Time from request to start analgesia (hours, median [IQR]) | 0.70 [0.42-1.2]        | 0.76 [0.27-1.0]       | 0.15       |
| Duration of analgesia (hours, median [IQR])                | 4.2 [2.1-7.2]          | 4.7 [2.6-7.0]         | 0.23       |
| Duration second stage of labour (hours, median [IQR])      | 0.45 [0.22-1.0]        | 0.47 [0.20-0.88]      | 0.55       |
| Mode of delivery                                           |                        |                       |            |
| Spontaneous                                                | 192 (72%)              | 355 (67%)             | 0.27       |
| Vaginal instrumental                                       | 28 (11%)               | 73 (14%)              |            |
| Caeserean section                                          | 45 (17%)               | 101 (19%)             |            |
| Postpartum haemorrhage (≥1000 ml)                          | 28 [9.3%               | 42 [8.7%]             | 0.77       |
| Apgar score <7 neonate 1                                   |                        |                       | 0.72       |
| 5 min                                                      | 8 (2.7%)               | 11 (2.3%)             |            |
| pHa <7.10 neonate 1                                        | 17 (7.4%)              | 20 (5.4%)             | 0.32       |
