# Supplementary material
Source: PubMed Central journal article supplement (PMC4794039)

Appendix 3: Supplementary figures [posted as supplied by author]

Fig A

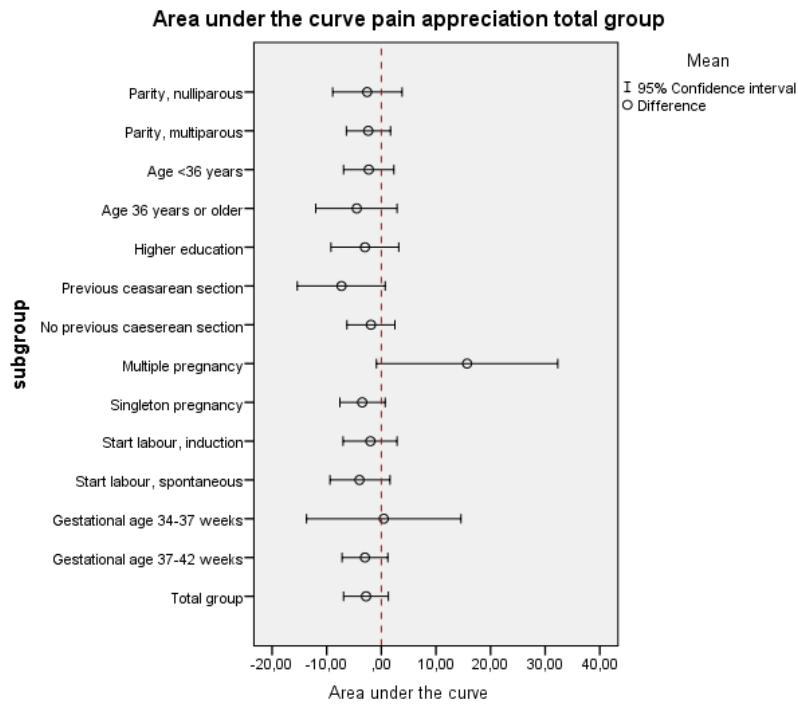

Fig B

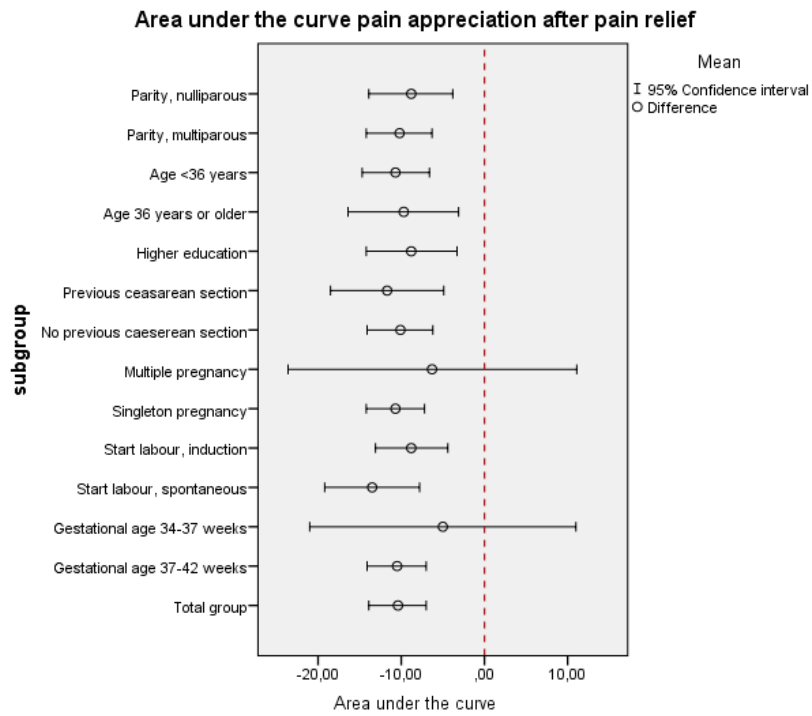

Fig C

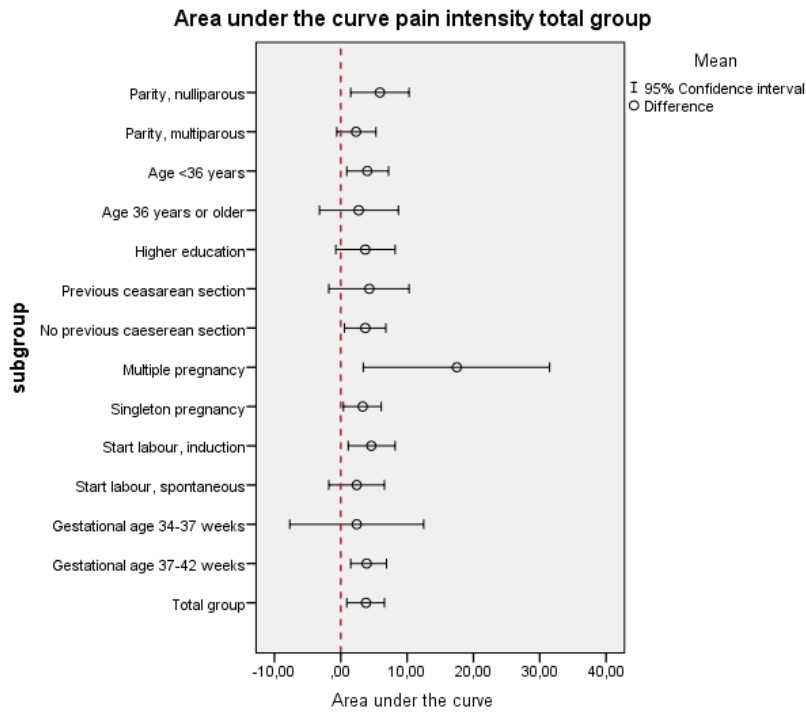

Fig D

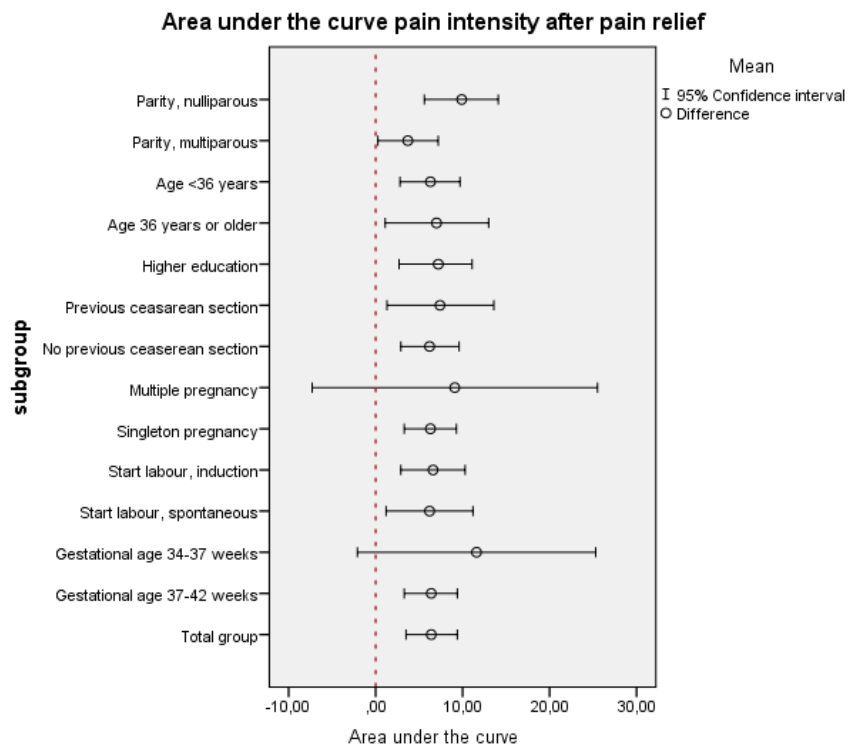

Supplement: frel021512.ww3_default.pdf [file frel021512.ww3_default.pdf]
